# Supplementary material for: Low temperature green synthesis of red emitting Pb-free CsMnBr 3 perovskite films
Source: Royal Society of Chemistry journal article supplement (doi:10.1039/d5ma01256b), 2025-12-08
Supplement: d5ma01256b1.pdf [file d5ma01256b1.pdf]

## Supplementary Information

### Low temperature green synthesis of red emitting Pb-free CsMnBr<sub>3</sub> perovskite films

Saurabh Singh <sup>a)\*</sup>, Xiyu Wen <sup>b)</sup>, Fuqian Yang <sup>a)</sup>

<sup>a)</sup> Materials Program, Department of Chemical and Materials Engineering, University of Kentucky, Lexington, KY 40506, USA

<sup>b)</sup> Center for Aluminium Technology, University of Kentucky, Lexington, KY 40506, USA

#### 1. EDS analysis

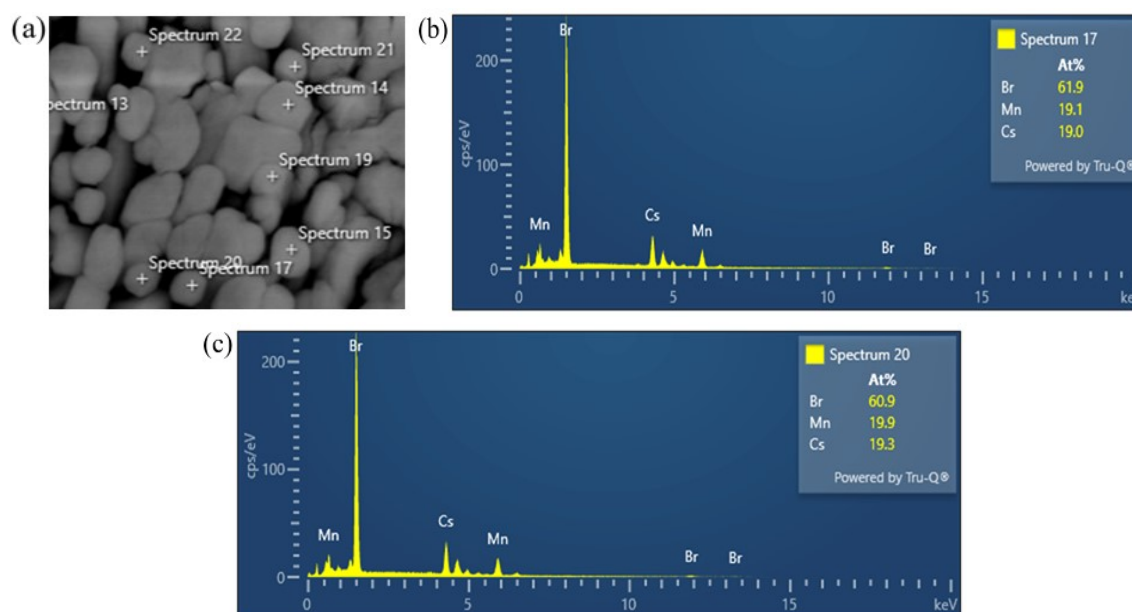

**Fig. S1.** (a-c) EDS analysis depicting 1:1:3 molar ratios of Cs:Mn:Br in as-prepared CsMnBr<sub>3</sub> films.

#### 2. Mathematical equations

Bragg's law is used to calculate the interplanar spacing 'd' from the diffraction peaks of CsMnBr<sub>3</sub> peaks and given below:

$$n\lambda = 2d\sin\theta \quad (\text{S1})$$

where 'n' is the order of diffraction, 'λ' is the incident wavelength, 'd' is the interplanar spacing and 'θ' is the diffraction angle.

The following d-spacing equation is used to calculate lattice parameters for hexagonal systems:

$$\frac{1}{d_{hkl}^2} = \frac{4(h^2 + hk + k^2)}{3(a^2)} + \frac{l^2}{c^2} \quad (\text{S2})$$

where ‘ $d_{hkl}$ ’ is the interplanar spacing for (hkl) crystallographic plane, and ‘ $a$ ’ and ‘ $c$ ’ are corresponding lattice constants for respective hexagonal structure.

The temperature dependence of PL peak wavelength is given as:

$$\lambda(T) = \lambda(T_0) + \beta_T \Delta T \quad (S3) \text{ for}$$

$|\Delta T/T_0| \ll 1$ . Here, ‘ $\lambda(T)$ ’ and ‘ $\lambda(T_0)$ ’ are the PL peak wavelengths at temperature  $T$  and a reference temperature ‘ $T_0$ ’, and ‘ $\beta_T$ ’ is a factor determining the thermal shift of PL peak wavelength, respectively.

The conductance ( $G$ ) of the CsMnBr<sub>3</sub> films is determined from corresponding I-V curves via the following equation:

$$G = \frac{dI}{dV} \quad (S4)$$

where ‘ $G$ ’ represents the conductance, and ‘ $dI/dV$ ’ represents the slope of I-V curves.

### 3. Electrical response of CsMnBr<sub>3</sub> films

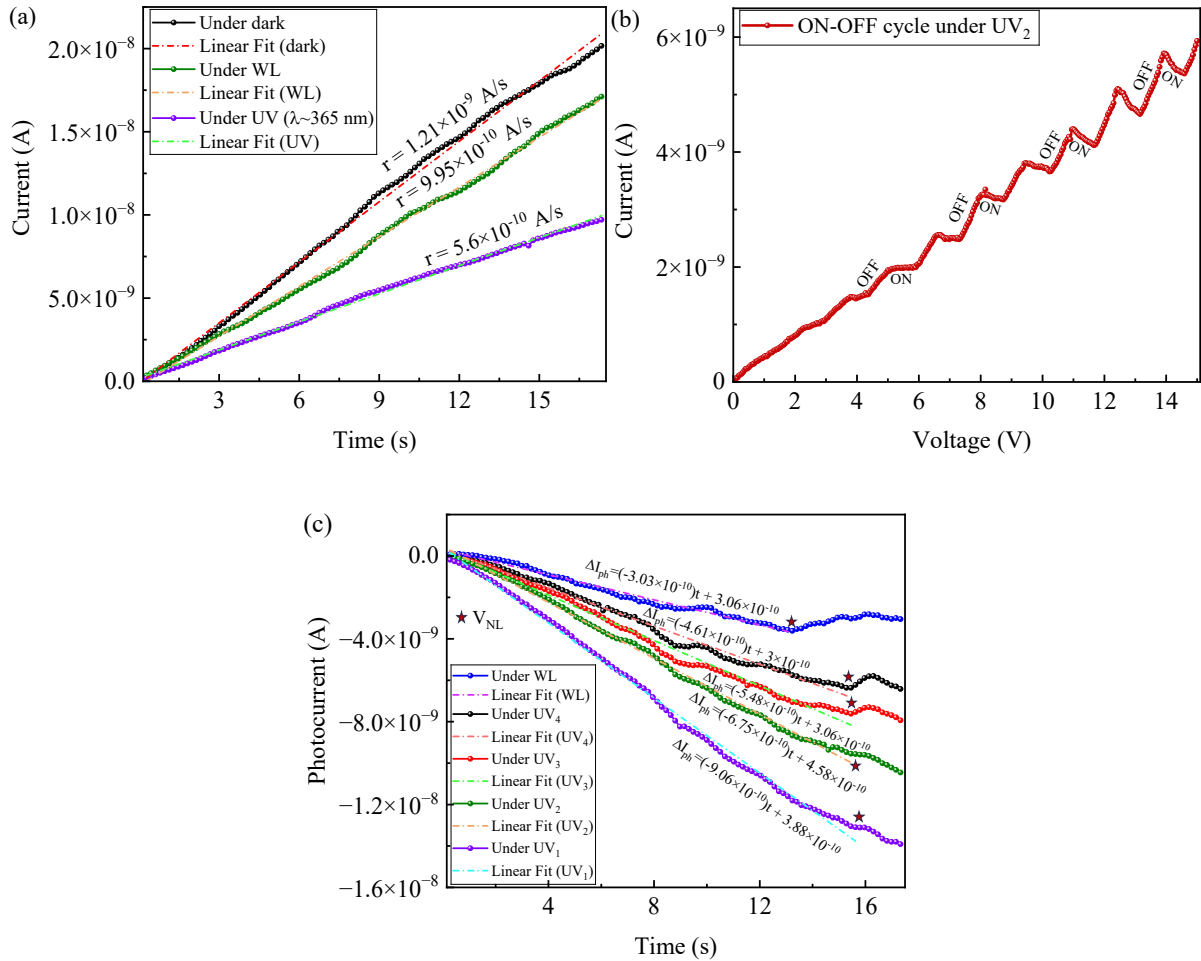

**Fig. S2.** (a) Current-time (I-t) characteristics of as-prepared CsMnBr<sub>3</sub> films under dark, white light, and UV light ( $\lambda$ : ~365 nm) at a scan rate of 0.55 V·s<sup>-1</sup>, and (b) I-V curve of as-prepared CsMnBr<sub>3</sub> films under UV light ( $\lambda$ : ~365 nm) with ON-OFF cycles at a scan rate of 0.25 V·s<sup>-1</sup>, and (c) photocurrent-time ( $\Delta I_{ph}$ -t) curves of as-prepared CsMnBr<sub>3</sub> films under UV irradiations of varying intensities.

The slopes of I-t curves are calculated using the following equation:

$$r = \frac{dI}{dt} \quad (S5)$$

where ‘r’ denotes the change rate of current, and ‘dI/dt’ is the slope of I-t curves.

The current-time (I-t) curves for the CsMnBr<sub>3</sub> films under cyclic ON-OFF UV irradiation can be approximately described by the following exponential equation:

$$I = I_0 + A_1 e^{-t/\tau} \quad (S6)$$

where ‘I<sub>0</sub>’ denotes the baseline current at ‘dark’ state, ‘A<sub>1</sub>’ represents steady state current under UV irradiation, and ‘ $\tau$ ’ represents the characteristic rise/decay time constants, respectively.

#### 4. PL spectra of CsMnBr<sub>3</sub> films on different substrates

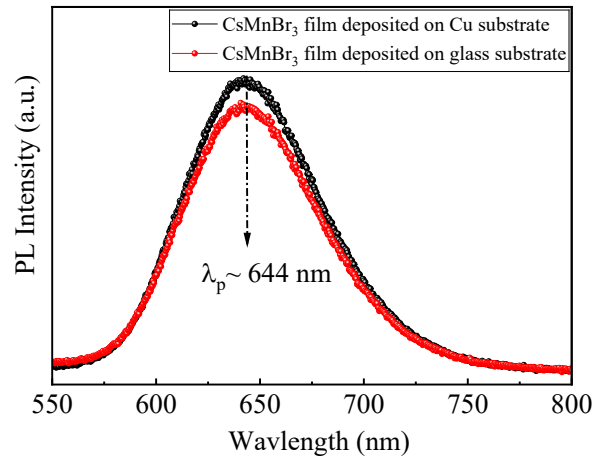

**Fig. S3.** Photoluminescence spectra of CsMnBr<sub>3</sub> films deposited on copper (Cu) and glass substrates, under UV excitation of ~ 365nm wavelength.

#### 5. White LCD backlight structures

##### 5.1 Schematic illustration of the fabrication procedure

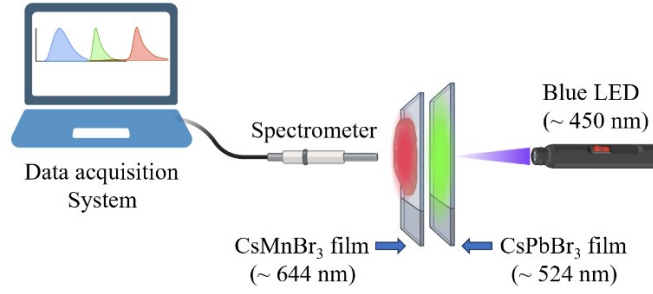

**Fig. S4.** Schematic of a white-emitting RGB LCD backlight structures fabricated via red-emitting CsMnBr<sub>3</sub> and green-emitting CsPbBr<sub>3</sub> films, excited with blue LED ( $\lambda \sim 450$  nm).

## 5.2 Color gamut coverage area calculations

**Table S1.** CIE coordinates of NTSC 1953 standard, sRGB standard and present work

| Standards    | ( $X_R, Y_R$ ) <sup>*</sup> | ( $X_G, Y_G$ ) <sup>*</sup> | ( $X_B, Y_B$ ) <sup>*</sup> | Gamut Coverage Area (GCA) | Relative Area Ratio (RAR) (%) |
|--------------|-----------------------------|-----------------------------|-----------------------------|---------------------------|-------------------------------|
| sRGB         | (0.64, 0.33)                | (0.3, 0.6)                  | (0.15, 0.06)                | 0.1120                    | 186.88                        |
| NTSC 1953    | (0.67, 0.33)                | (0.21, 0.71)                | (0.14, 0.08)                | 0.1582                    | 132.36                        |
| Present work | (0.71, 0.289)               | (0.16, 0.79)                | (0.15, 0.03)                | 0.2094                    | 100                           |

\*Here, the subscripts 'R', 'G', and 'B' correspond to red, green, and blue emissions, respectively.

The color Gamut Coverage Area (GCA) spanned by RGB triangle in Fig. 11 (manuscript) is calculated via:

$$GCA = (X_R \times Y_G + X_G \times Y_B + X_B \times Y_R - X_R \times Y_B - X_G \times Y_R - X_B \times Y_G) / 2 \quad (S7)$$

Further, the Relative Area Ratio (RAR) is calculated via:

$$RAR = \frac{(GCA)_{\text{Present work}}}{(GCA)_{\text{Standard}}} \times 100 \quad (S8)$$
